# Supplementary material for: Industrial-scale application of electrokinetics heralding a new era of sustainable mining
Source: Research Square preprint supplement (doi:10.21203/rs.3.rs-4136969/v1), 2024-05-20
Supplement: Supplementary file 1 [file 1817d42d25f531c01c578871.docx]

**Industrial-scale application of electrokinetics heralding a new era of sustainable mining**

Gaofeng Wang1,2,5, Jianxi Zhu1,2,5*, Xiaoliang Liang1,2,5, Bowen Ling3,4, Jie Xu1,2,5, Yongqiang Yang1,2,5, Shichang Kang1,2,5, Wei Tan1,2,5, Yongjin Xu1,2,5, Xiaoshan Zou1,2,5, Lingyu Ran1,2,5, Jingming Wei1,2,5,Hongping He1,2,5

1 *CAS Key Laboratory of Mineralogy and Metallogeny/Guangdong Provincial Key Laboratory of Mineral Physics and Material, Guangzhou Institute of Geochemistry, Chinese Academy of Sciences; Guangzhou 510640, China*

*2 CAS Center for Excellence in Deep Earth Science; Guangzhou 510640, China*

*3 Institute of Mechanics, Chinese Academy of Sciences; Beijing 100190, China*

*4* *School of Engineering Science, University of Chinese Academy of Sciences, Beijing, 100049, China*

*5 University of Chinese Academy of Sciences; Beijing 100049, China*

*Corresponding author

E-mail address: zhujx@gig.ac.cn (J. Zhu)

**Table of Contents Summary**

Supplementary Text Section S1 to Section S8

Supplementary Figures S1 to S18

Supplementary Tables S1 to S6

Supplementary References (1-5)

Supplementary Text

**Section S1*.*** **Methods**

**Sampling and samples pretreatment.** To determine the characteristics of the IAD ore, nine sampling wells were set with an equal spacing in the mining area to collect samples. In each sampling well, samples were collected at an interval of 1 m, and a total of 202 samples were collected to determine the initial information of the mining area. The collected samples were dried at room temperature and ground into powder with a particle size of <75 μm for characterizations.

***Analytical methods.*** The contents of ion-exchangeable REEs were determined by an inductively coupled plasma mass spectrometry (ICP-MS, Thermo iCAP RQ). For solid samples, the ion-exchangeable REE was extracted using (NH4)2SO4 (0.2 M, pH = 5.32) solution, where the solid-to-liquid ratio and ion extract time were 1:5 and 24 h, respectively. The extracted REE solution was separated from the solid sample by centrifugation at 6000 × g for 10 min. The supernatant was acidified with 10 µL of ultrapure concentrated nitric acid (1% v/v), and 10 mL of the acidified solution was passed through a 0.22 μm filter membrane for ICP-MS analysis. For liquid samples (e.g., the collected leachates, groundwater, and surface water), acidification and filtration were operated before measurement. During ICP-MS measurement, several rock and sediment standards (GSD-09, GSD-11, GSR-2, GSR-3, SARM-4, W-2, and AGV-2) from the United States Geological Survey and China were used for external quality control, and Rh was used as an internal standard to calibrate the drift of the instrument. The analytical precision was better than 3% RSD. The concentrations of metallic impurities were determined by an inductively coupled plasma optical emission spectrometer (ICP‒OES, Agilent 730). The procedure using ICP-OES for sample measurement is similar to that using ICP-MS. The recovery rate of REE using EKM or the conventional leaching technique was calculated according to Equation (1):

(1)

where *REOrece* (t) is the collected amount of REO after EKM treatment and *REOinit*(t) represents the initial REO content of the ion-exchangeable REE before EKM treatment.

The concentration of NH4+ was measured by a UV‒visible spectrophotometer (Shimadzu UV-2550). In a typical procedure of Nessler's reagent spectrophotometry1, 50 mL of the liquid sample was added into a cuvette with subsequent addition of 1.0 mL of potassium sodium tartrate and 1 mL of HgI2-KI-NaOH solution. The mixture was oscillated by ultrasonic wave for 15 minutes and measured immediately at a wavelength of 420 nm using a spectrophotometer. If the measured ammonia nitrogen concentration is higher than 2 mg/L, it needs to be diluted to less than 2 mg/L. The concentration of NH4+ was calibrated by a series of standard working solutions ranging from 0 to 2 mg/L.

The generated current with the applied voltage was recorded by the smart power supply unit, and the equivalent resistance was calculated accordingly. The energy consumption during the EKM experiment was read from the smart power supply.

***Uncertainty analysis.*** In this work, the uncertainty originated mainly from two routes, i.e., experiments (Type A uncertainty) and measurements (Type B uncertainty). To reduce uncertainty from experiments, the ion-exchangeable REE extraction experiments were carried out in triplicates, and the leachates, the groundwater, and the surface water were collected three times a day in fixed time during EKM and the average value was applied. The type A uncertainty (*μA*) was calculated by Equation (2):

(2)

where *n* is the experimental repetition time, *xi* is the result of Experiment *i*, and is the average result of n experiments.

For ICP-MS and ICP‒OES measurement, the analytical precision of these two instruments was better than 3% RSD, and the type B uncertainty (*μB-ICP*) was calculated by Equation (3):

(3)

Finally, the combined standard uncertainty (*μ*) was calculated by Equation (4):

(4)

***Characterization methods.*** The mineral compositions of the IAD ore were determined by powder X-ray diffraction (XRD) using a diffractometer (Bruker D8 Advance). XRD patterns of samples were collected using a copper source (40 kV and 40 mA) over an angular range of 3–80° 2θ at a step size of 0.01° and a scan speed of 5°/min.

**Section S2*.*** **Characterizations of the mining ore.**

The mining site is in Meizhou City, which is in close proximity to Jiangxi and Fujian provinces in South China (as shown in Fig. S1a). This site represents a typical regolith-hosted REE deposit (Fig. S1b)2, 3. To obtain properties of the mining ore and facilitate accurate design and calculation of the recovery rate, a set of exploratory wells were drilled for sampling purposes prior to mining (as depicted in Fig. S2a). By analyzing the measured data from 9 exploratory wells (as presented in Table S1 and Fig. S2b), it was observed that the ion-exchangeable REE content in the mining ore generally exhibits an upward trend from approximately 100 mg/kg to around 1500 mg/kg as the depth of the wells increases. The distribution of REE in the mining ore is visualized using a three-dimensional heatmap (as shown in Fig. S2c). The heatmap illustrates that the orebody rich in REEs, referred to as the zone where the REE content exceeds 400 mg/kg, is situated between depths of 9 and 24 meters. Moreover, the REEs primarily concentrate in the lower section (15-24 meters) of the mining ore. To further analyze the REE reserves within the mining ore, calculations were conducted based on the REE contents and the weight of the soil, as outlined in Table S2.

Moreover, the Boynton chondrite normalized patterns of REEs in typical exploratory wells suggest that the mining ore is characterized by LREE-abundance with predominant Ce and Eu anomalies (Fig. S3a). However, the vertical distribution of the LREE/HREE ratio in the mining ore suggests that the minable zone is relatively rich in HREE as the LREE/HREE ratio decreases from the topsoil downwards (Fig. S3b). These REEs are mainly adsorbed on clay minerals including kaolinite, halloysite, and illite based on XRD measurements (Fig. S4).

In order to determine the depth of the bedrock layer in the mining area and plan the placement of collection wells, an approximation was made using interpolation algorithms on the exploratory data (refer to Table S1). The interpolation algorithm was implemented in MATLAB®. Initially, we measured the locations and altitude of nine drilling holes. Subsequently, we measured the depths (D) of the drilling holes. Based on these data, a 10×10 mesh was used to interpolate the REE distribution, and a similar procedure was adopted for the base floor. The resulting predicted three-dimensional heatmap indicates that the bedrock layer is not uniform and takes on a funnel-shaped form, with the middle zone being lower than the surrounding zones (Fig. S2d).

**Section S3*.*** **Design and implementation of the industrial-scale EKM.**

To facilitate the mining process, a total of 176 injection wells were drilled in situ. These wells were arranged in a grid pattern, with 16 rows and 11 columns, covering the entire mining area. Each well had a spacing interval of 1 meter and a depth of 22 meters. This arrangement allowed for the division of the mining area into 16 distinct sections.

To prevent electrode corrosion and minimize water electrolysis in soils, we design a conductive plastic electrode (CPE). Unlike traditional metals and alloys, the CPE is made from a combination of plastic and conductive compounds. This composition helps to protect the electrodes from erosion. The conductivity of the CPE is measured at 1.861×104 S/m, and it can withstand a current of up to 70 A, as shown in Fig. S5. These results demonstrate the excellent conductivity and durability of the CPE. Furthermore, the CPE is flexible and deformable, enabling it to establish better contact with the ore body during the EKM process.

**Section S4. Voltage gradient barrier (VGB) mechanism**

In contrast to laboratory experiments where the experimental containers are sealed or enclosed, real mining sites have an open environment. The boundaries of the ore body are connected to the surrounding area, which can result in the presence of fractures or highly permeable paths. These pathways can lead to a leakage of subsurface flow. This leakage can cause a significant waste of leaching agents, and as a result, the recovery rate may decrease dramatically. The insufficient contact between the leaching agent and the IADs further contributes to the recovery rate drop. In our industrial-scale EKM experiment, we utilized electro-osmosis to control the subsurface flow in a single direction. By applying a high voltage to the three outer edges of the mining site, we established a high voltage gradient (80 V·m-1) along the boundaries, known as the voltage gradient barrier (VGB). Simultaneously, we maintained a low voltage on the collecting side to prevent subsurface flow from leaking out into the surrounding area.

In the EKM process, VGB occurs and experiences the following steps. In the high-voltage (HV) regions, we found that the current dramatically rose from ~10 A to ~25 A in the first ~100 h, slightly fluctuated at ~25A between 100 and 250 h, and decreased towards near 0 A after 250 h (Fig. S6). Correspondingly, the equivalent resistance of the mining ore showed a decrease in the first ~100 h, a fluctuation between 100 and 250 h, and an increase to the maximum (750 Ω) close to that of the dry soil. We interpret that the VGB mechanism involves 3 processes: (I) conductive fluid infiltration, (II) REE desorption and extraction, and (III) electro-osmosis dewatering. When the conductive fluids enter into the HV region, the equivalent resistance of the weathering crust soil decreases, and the resultant current increases suddenly (process I). Meanwhile, a strong electric field is generated by the high voltage which extracts REEs from the HV region (process II). The conductive fluid infiltration and REE extraction occur simultaneously which result in the fluctuation of the current, for instance, 25 A in our EKM experiment. After most REEs are extracted from the HV region, electro-osmosis dominates process III, leading to a dramatic increase and decrease in the soil resistance and resultant current, respectively. As such, both REEs and water were kept out of the HV region, the HV region and the high voltage gradient act as a barrier blocking the REE fluids. The presence of the VGB mechanism was further verified by a confirmatory experiment, where REE fluids were prevented from entering the HV (80 V·m-1) region as well (Fig. S7). In comparison to the conventional leaching technique, the HVB mechanism helps reduce the leakage of REE fluids and improves the yield of the REE recovery.

The effect of the VGB mechanism during the industrial-scale EKM activity was shown later.

**Section S5*.*** **Intermittent power alternation (IPA) strategy**

In preliminary experiments (Fig. S8), we found that electrodes interfered with each other when simultaneously powered on. To avoid these adverse effects, we proposed an intermittent power alternation (IPA) strategy for EKM. The operation way is illustrated in Fig. S9a and the powered-on electrodes in each turn are listed in Table S3. The electric potential maps in each period of such an IPA strategy are simulated using the software ElecNet (version 7.5) and presented in Fig. S9b. The result suggests that REEs will be invariably transported in the same direction because the distribution of the electric potential remains constant in any period of the IPA. Moreover, the anode and the cathode are periodically switched during EKM, which helps the depolarization of electrodes and increases the current efficiency. In any EKM process, only one-third of the mining area is powered on, which means that at least two-thirds of the electricity is saved by applying the IPA strategy compared to if all the mining areas are powered on. More importantly, the leaching agents are allowed to have a sufficient ion exchange reaction with REEs in powered-off periods, contributing to the improvement of REE recovery rate.

To determine an appropriate power-on time in each period of the IPA, the effect of the power-on time (i.e., 8h, 1h, and 20 min, respectively) on the EKM process has been investigated, and the result is displayed in Fig. S10. Result shows that the generated current drops dramatically in the initial 20 min, decreases slowly between 20 min and 1h, but keeps almost unchanged after 1h. The drop of the current during the EKM process results from REEs and other conductive ions are extracted out of the IAD ore. Such a result suggests that the applied direct current is the most effective for mobilizing REEs in the initial 20 min, thus, the power-on time is determined as 20 min in each period of the IPA. The applied voltage gradient gradually rises from 20 to 60 V·m-1 during the EKM process to maintain an effective current. The whole mining process that involves the IPA strategy is automatically controlled by a self-developed smart power supply (Fig. S11), consisting of a main power supply, several modules, and a host system.

**Section S6*.*** **Breakthroughs of the industrial-scale EKM.**

In comparison to the conventional leaching technique, an 80% reduced leaching agent, i.e., 8 t of (NH4)2SO4 solutions with designed concentrations (Table S4), was injected into the ore in the first week. The equivalent resistance of the mining ore decreased dramatically from 1569 Ω of the original dry soil to 0.5 Ω in the first 12 h, then decreased slowly to ~0.08 Ω in 48 h before keeping almost constant (Fig. S12). The significant drop in the equivalent resistance of the mining ore results from the introduction of leaching agent ions and water and is the theoretical base for EKM.

According to the applied voltage gradient (20 to 60 V·m-1), the EKM process was divided into 6 stages (Fig. S13). In the first two stages (20 and 30 V·m-1), the total current was maintained at 400 A, which is the maximal output of a single power supply. In the later four stages (45 to 60 V·m-1), two power supplies were used and the generated currents gradually decreased with the mining progression (Fig. S13). The equivalent resistance grows from 0.08 Ω to 0.25 Ω in the whole KEM process, suggesting that REE fluids are extracted from the ore. It is worth noticing that the equivalent resistance grows faster in higher voltage gradients than in lower voltage gradients (Fig. S13), suggesting that a high voltage gradient leads to a high mining efficiency. The mining time can be thus shortened by increasing the applied voltage gradient.

Consequently, the recovery rate of REE exhibited a straight increase with EKM time and reached 95.5% within 60 days by using the EKM technique. The conventional leaching technique has a recovery rate of 40%-60% and requires mining time over 1 year4, 5. This suggests that the EKM technique can achieve a higher recovery rate but requires less mining time. For comparison, the industrial-scale experiments using the conventional leaching technique were carried out. In 60 days of conventional leaching, the REE concentration in the collected leachates was lower than 100 mg/L (Fig. S14), and only ~15% of the estimated REO was recovered from the mining ore. In addition, the average Aluminum concentrations in the collected leachates within 60 days of mining were 135 and 13 mg/L by using the conventional and EKM techniques, respectively. This suggests a reduction of 90% of the Al impurity in the collected REE leachates by using the EKM technique in comparison to the conventional technique. These results are highly encouraging, as all the claimed merits of the EKM technique have been achieved at the industrial scale, which further confirms the viability of the approach for practical applications.

**Section S7. Environmental assessment of the industrial-scale EKM.**

To evaluate the possible environmental impacts caused by the EKM technique, we monitored variations of NH4+ and REE in the surrounding groundwater and surface water during the EKM process. Three environmental monitoring wells were placed along the upstream, midstream, and downstream of the mining ore, respectively, to collect samples for analysis (Fig. S15).

Before the EKM activity, the concentrations of NH4+ in the groundwater were 0.96, 0.75, and 1.82 mg/L in the upstream, midstream, and downstream, respectively (Fig. S16). The concentrations of NH4+ in the upstream and midstream meet the standard for water quality III (<1 mg/L) of China, while the groundwater in downstream is contaminated. The elevated concentration downstream is attributed to the existence of an abandoned mine that is close to the downstream monitoring well. This mine previously employed the conventional ammonium-salt-leaching technique, resulting in an overflow of leaching fluid into the downstream water bodies (refer to Fig. S15). Despite being abandoned for over 10 years, the groundwater near the mine still exhibits an NH4+ concentration of 8.79 mg/L, underscoring the significant environmental impact of the excessive use of ammonium salts in the conventional leaching technique.

In the EKM process, NH4+ concentrations in the groundwater slightly fluctuated and the average concentrations (in 60 days of the EKM process) were 0.72, 0.40, and 1.16 mg/L in the upstream, midstream, and downstream, respectively (Fig. S17a). These values are all lower than those before EKM, suggesting that the EKM activity does not influence the surrounding groundwater. Similar results were observed in the surface water. The NH4+ concentrations in the surface water were 0.14, 0.27, and 9.11 mg/L before EKM, and 0.04, 0.24, and 9.51 mg/L after EKM, in the upstream, midstream, and downstream, respectively (Fig. S17b). The NH4+ concentrations in the surface water fluctuated in a reasonable range without interfered by the EKM experiment.

To determine whether there was a leakage of REE during the EKM process, we monitored the variations of REE concentrations in the groundwater and surface water. The REE concentrations in the groundwater were 0.43, 1.22, and 1.75 mg/L before EKM, and 0.77, 0.36, and 1.20 mg/L after EKM, in the upstream, midstream, and downstream, respectively (Fig. S17c). The REE concentrations in the surface water were 0.36, 0.27, and 0.91 mg/L before EKM, and 0.64, 0.01, and 1.34 mg/L after EKM, in the upstream, midstream, and downstream, respectively (Fig. S17d). The results show that, REE concentrations in both the groundwater and surface water changed little after EKM.

Furthermore, we systematically compared the environmental impacts of the EKM technique with the conventional leaching technique. In the conventional leaching process, the NH4+ concentrations in the collected leachates displayed a “V-shape” (Fig. S18), this is because a high amount of (NH4)2SO4 was added at the initial and final mining stages to achieve a high recovery rate of REE. The average NH4+ concentration (within 60 days of the mining process) in the collected leachates was 1375 mg/L. In the EKM process, the NH4+ concentrations in the collected leachates decreased with increasing the EKM time since (NH4)2SO4 was only added at the initial stage, and the average NH4+ concentration in the collected leachates was 62 mg/L. Compared to the conventional leaching technique, the NH4+ concentration in the collected leachate was significantly reduced by 95.49%. This primarily results from the significantly lowered amount of the leaching agent by applying the EKM technique. Due to the huge decrement in the usage of (NH4)2SO4, the discharged NH4+ in the groundwater (0.41 mg/L) and surface water (0.271 mg/L) was reduced by 94.89% and 98.08%, respectively, by using the EKM in comparison to that used in the conventional techniques.

**Section S8. Techno-economic analysis of the industrial-scale EKM.**

To assess the economic feasibility of the EKM technique, the production costs of this industrial-scale EKM experiment were calculated and summarized in Table S5. Generally, the production costs constituted equipment, materials, electricity, labor, and engineering, among which, the costs of equipment ($43,527) and materials ($16,641) were the two biggest. This is mainly because the smart power supply and CPE are expensive since they are newly developed and customized. The relevant cost will be reduced in scaled-up applications.

To provide an example, the production costs for obtaining 1 t of REO by the conventional and the EKM techniques were calculated to be $6,214 and $7,078, respectively (see Table S6 for details). The production costs by using these two techniques are comparable in optimization conditions, demonstrating the economic feasibility of the EKM technique for industrial applications. In comparison to the conventional technique, the costs associated with electricity, such as the power supply, electric wires, CPE, and energy consumption, increase, while the costs of agents decrease. This appeals to the characteristic of the EKM technique, which accelerates REE migration using an applied electric field with a lowered amount of ammonium salts.

However, the current expenditures on power consumption ($420 per t of REO) and CPE ($812 per t of REO) require to be further reduced for practical use. To lower the power consumption, the electrical conductivity of the CPE can be improved. Though the conductivity (1.861×104 S/m) of a plastic-made electrode is quite well, it is still much worse than that of a metal electrode (e.g., the conductivity of a Cu electrode is 59.5×106 S/m). Moreover, one can optimize the EKM strategy and arrangement to save electricity. To reduce the CPE material cost, developing repeatable CPE should be an economic way.


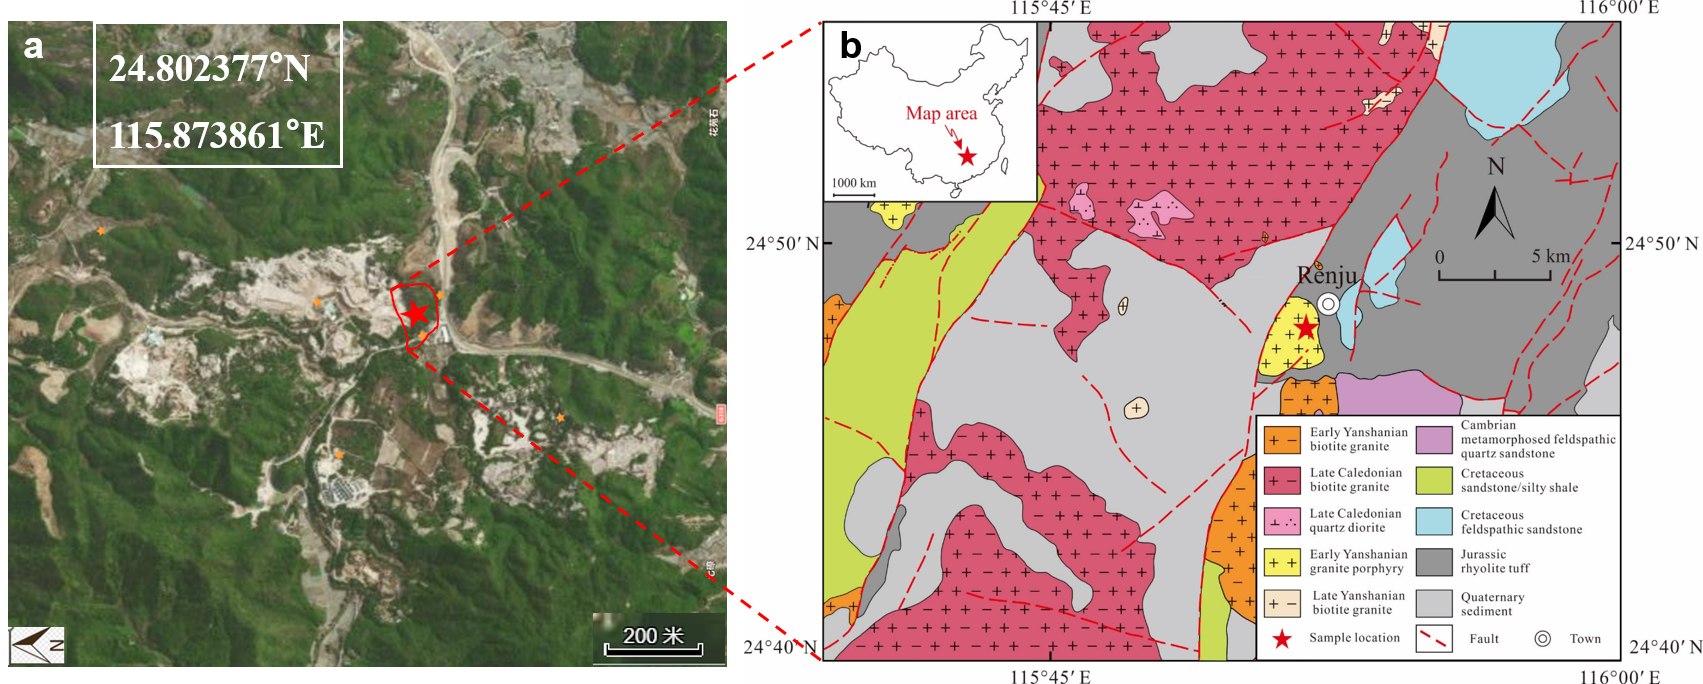


**Fig. S1.** (a) Location map and (b) geological background of the mining ore (after Tan, et. a., 2021). The mining area is located in N24.80° and E115.87°.


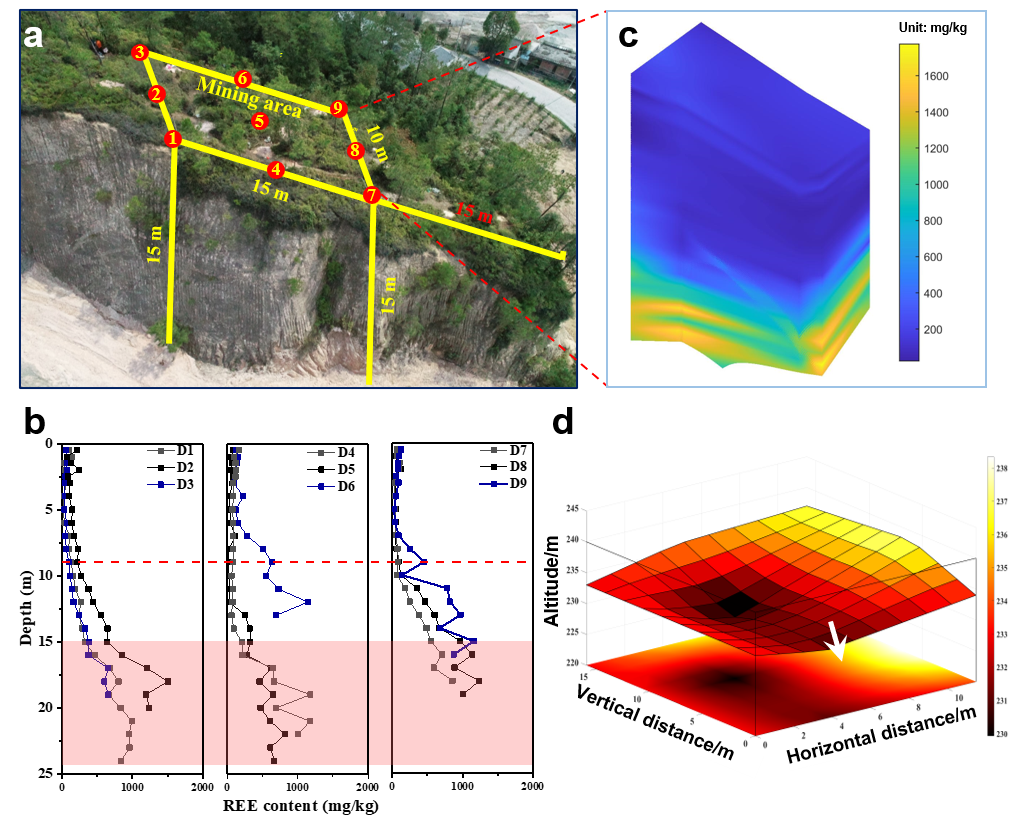


**Fig. S2.** Characterizations of the mining ore. (a) Photograph of the EKM mining area. (b) the vertical distribution of REE in the mining area. (c) 3D heat map for the REE distribution in the mining area. (d) the predicted 3D heat map for the base in the mining area.


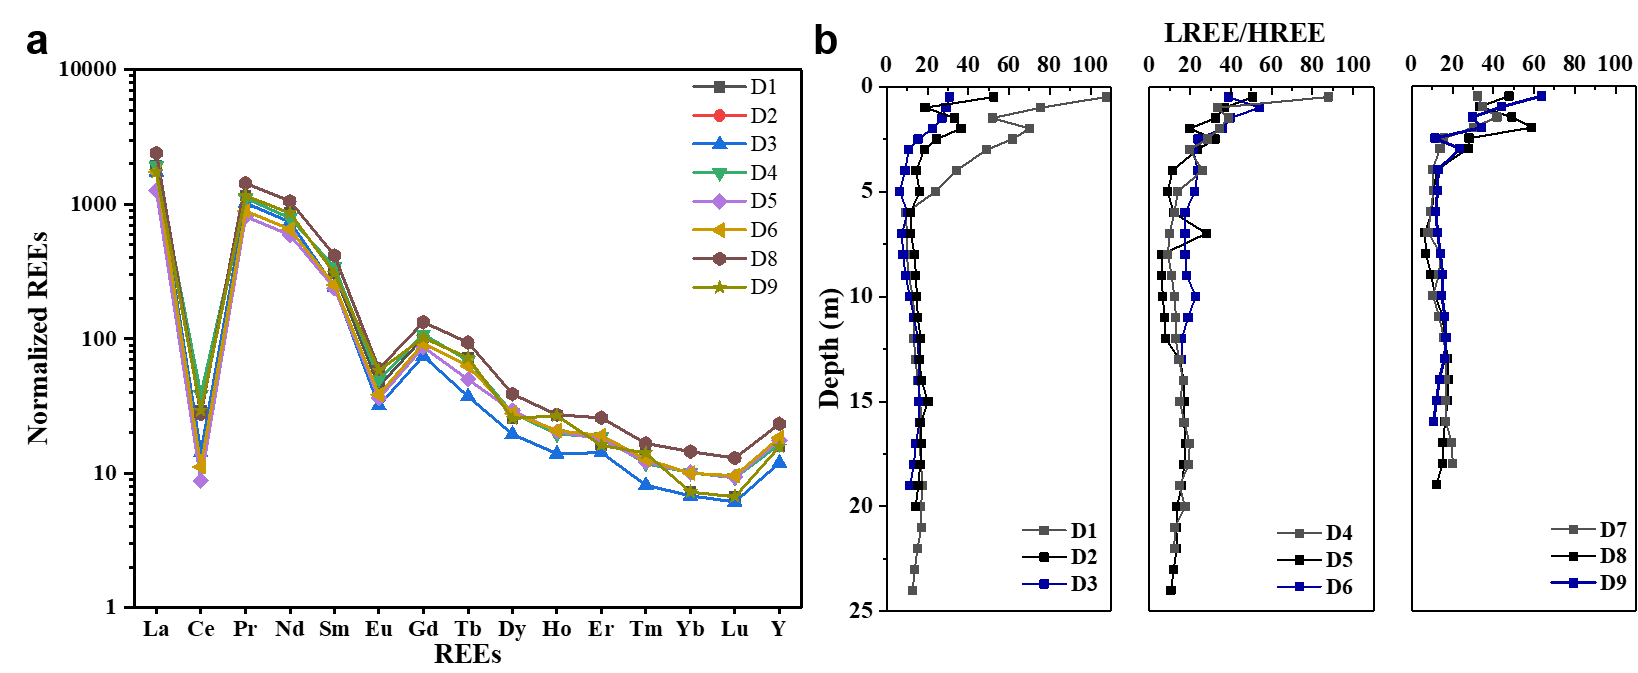


**Fig. S3.** (a) The Boynton chondrite normalized patterns of REE in typical exploratory wells and (b) the vertical distributions of LREE/HREE ratios in the mining area.


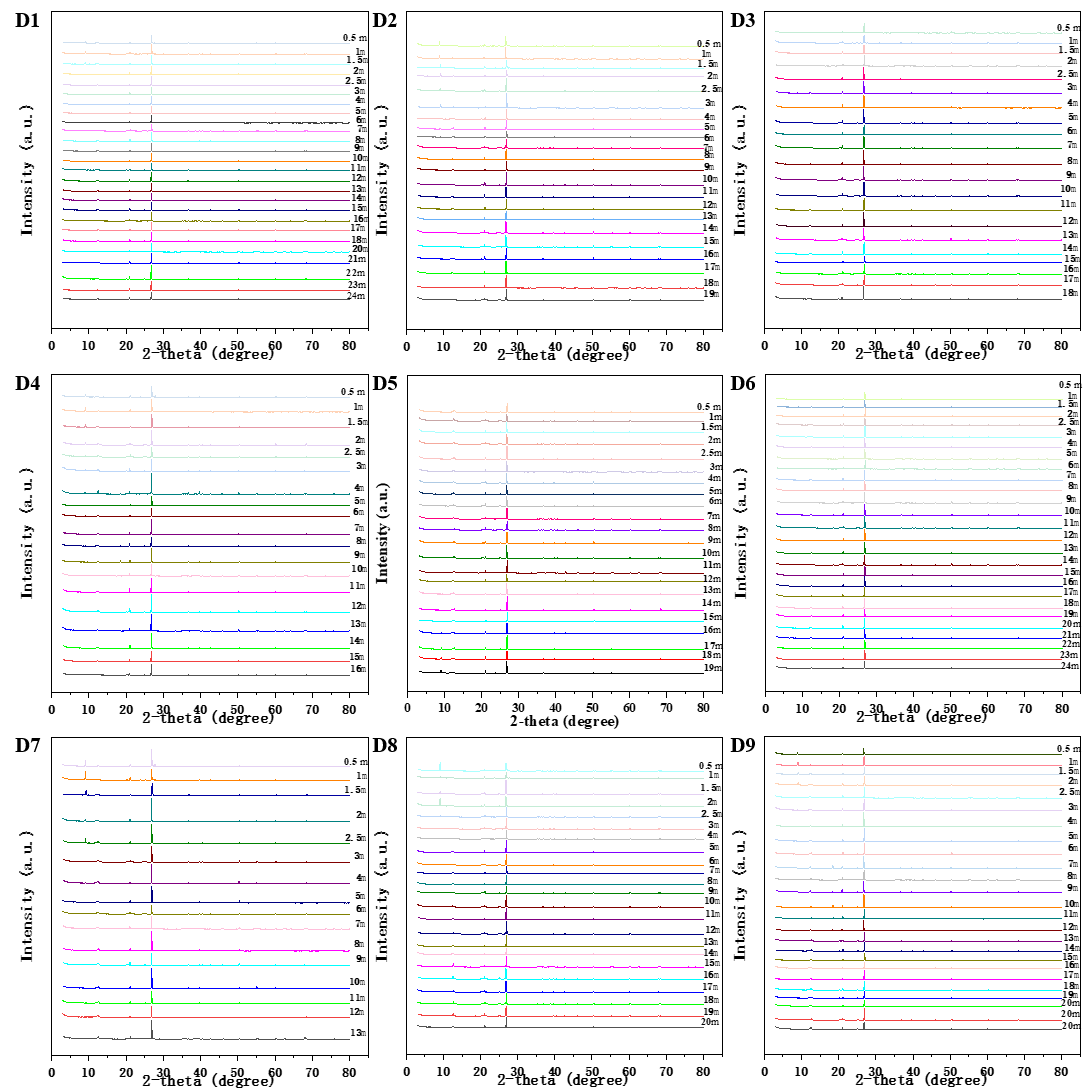


**Fig. S4.** XRD patterns of samples in the mining ore.

**Fig. S5.** Conductivity and corrosion resistance test of the CPE product.

**Fig. S6.** The applied voltage gradient, the generated current, and the equivalent resistance at a high voltage gradient (80 V·m-1).

**Fig. S7.** Results of the confirmatory experiment for the VGB mechanism. The applied voltage gradient is 80 V·m-1.

**Fig. S8.** The interaction among electrodes when they are powered on simultaneously.


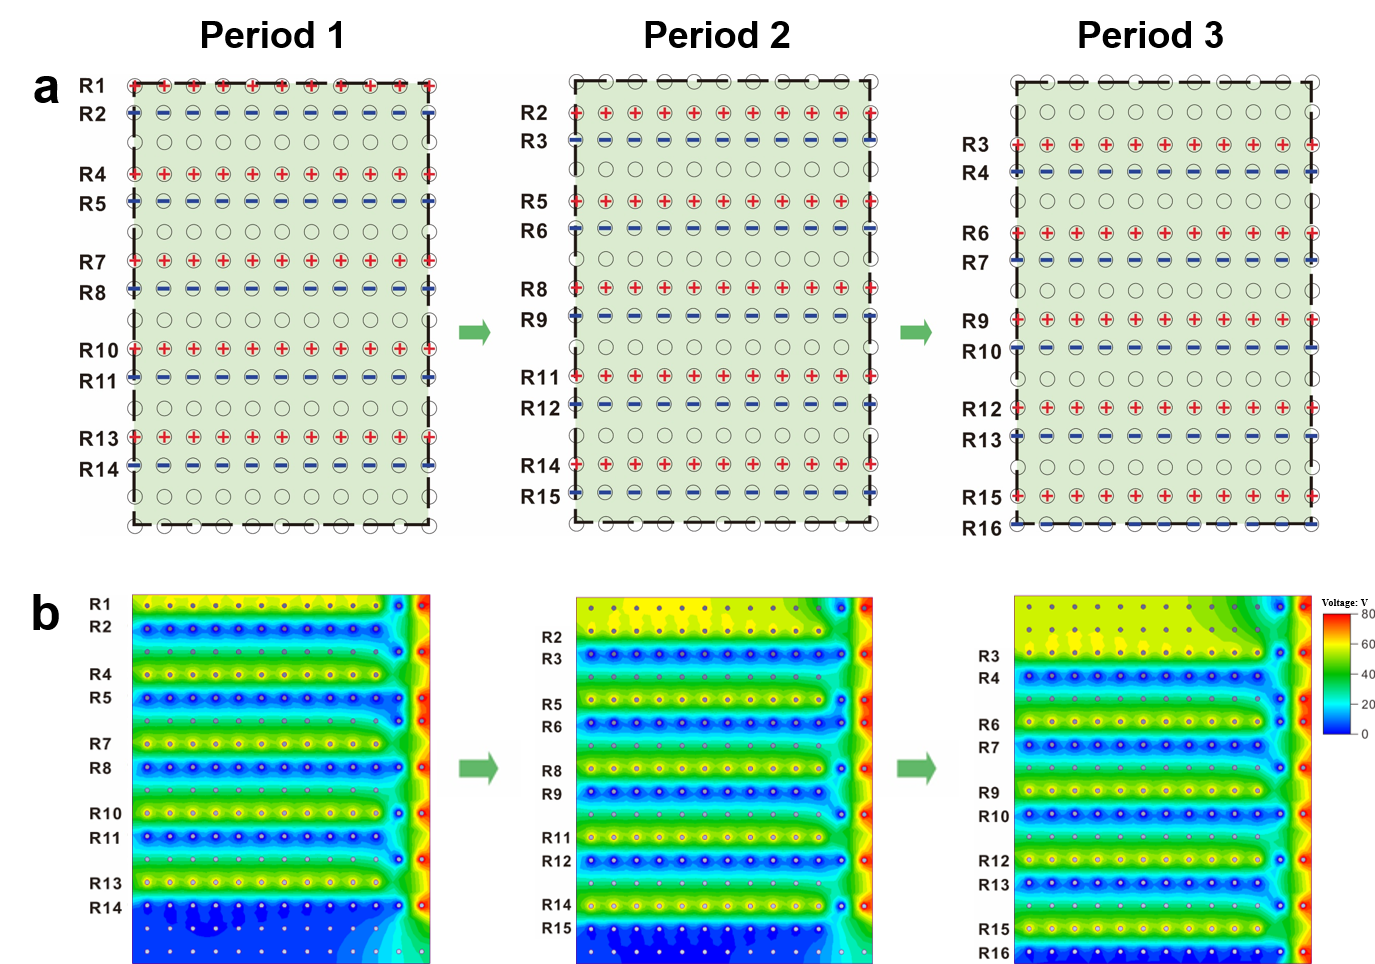


**Fig. S9.** (a) Schematic of the intermittent power alternation (IPA) strategy and electric potential maps at various mining periods.

**Fig. S10.** Effect of the power-on time on the EKM process.


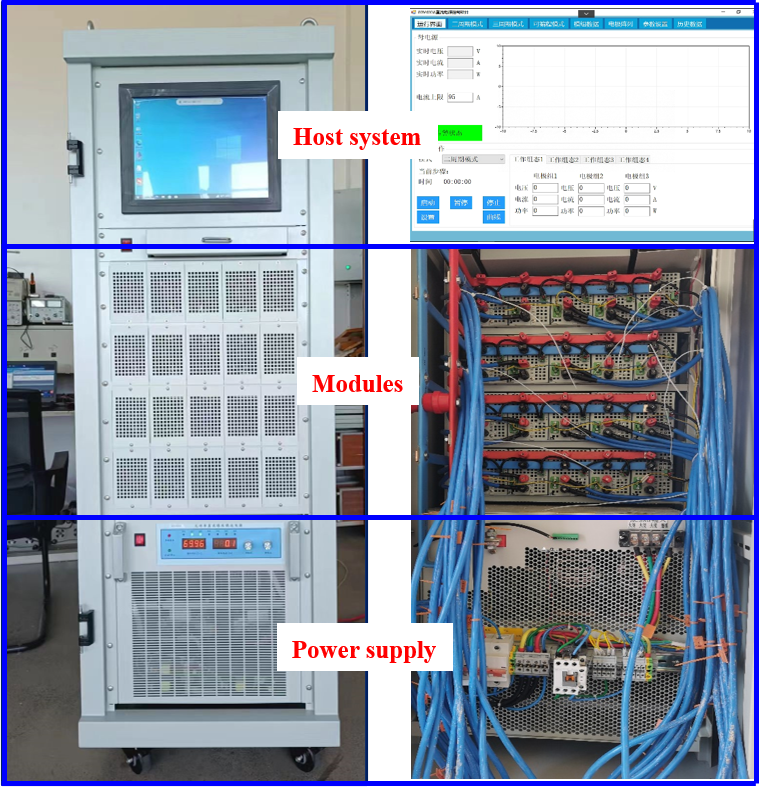


**Fig. S11.** Photograph showing the smart power supply and its components.

**
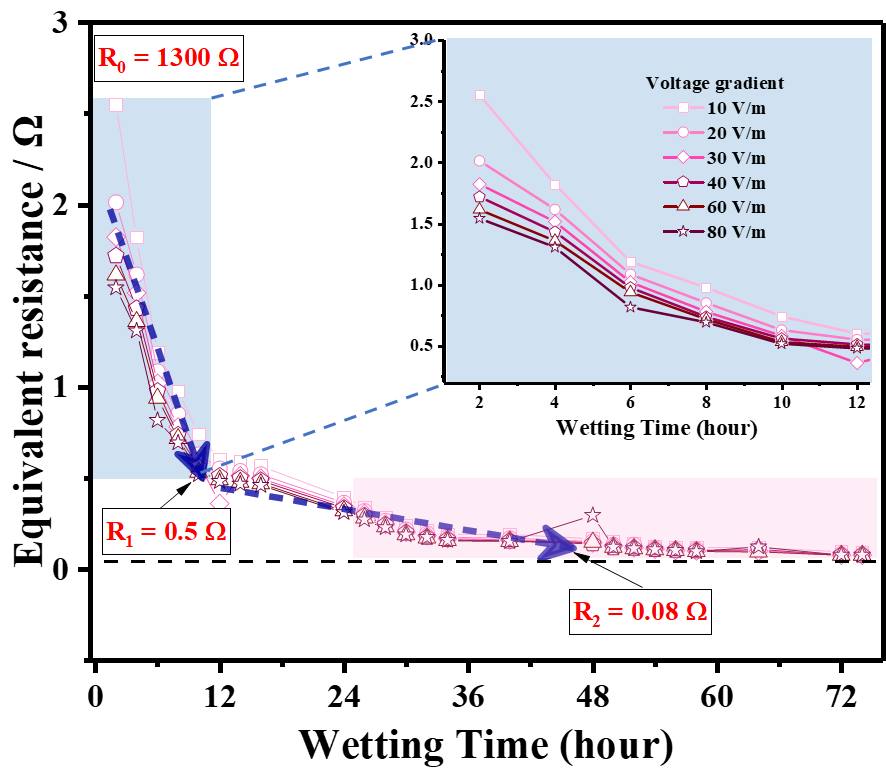
**

**Fig. S12.** The variation of the equivalent resistance of the experimental ore with adding the electrolyte solution in the first 72 of the EKM. The insert figure is the enlarged view of 0-10 h.


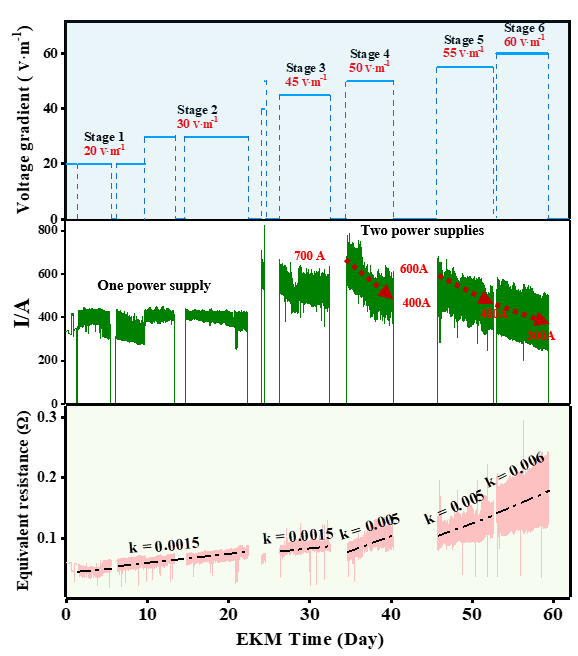


**Fig. S13.** The applied voltage gradient, the generated current, and the equivalent resistance in the EKM process.

**Fig. S14.** The REE concentration in the collected leachates in 60 days of conventional leaching.

**
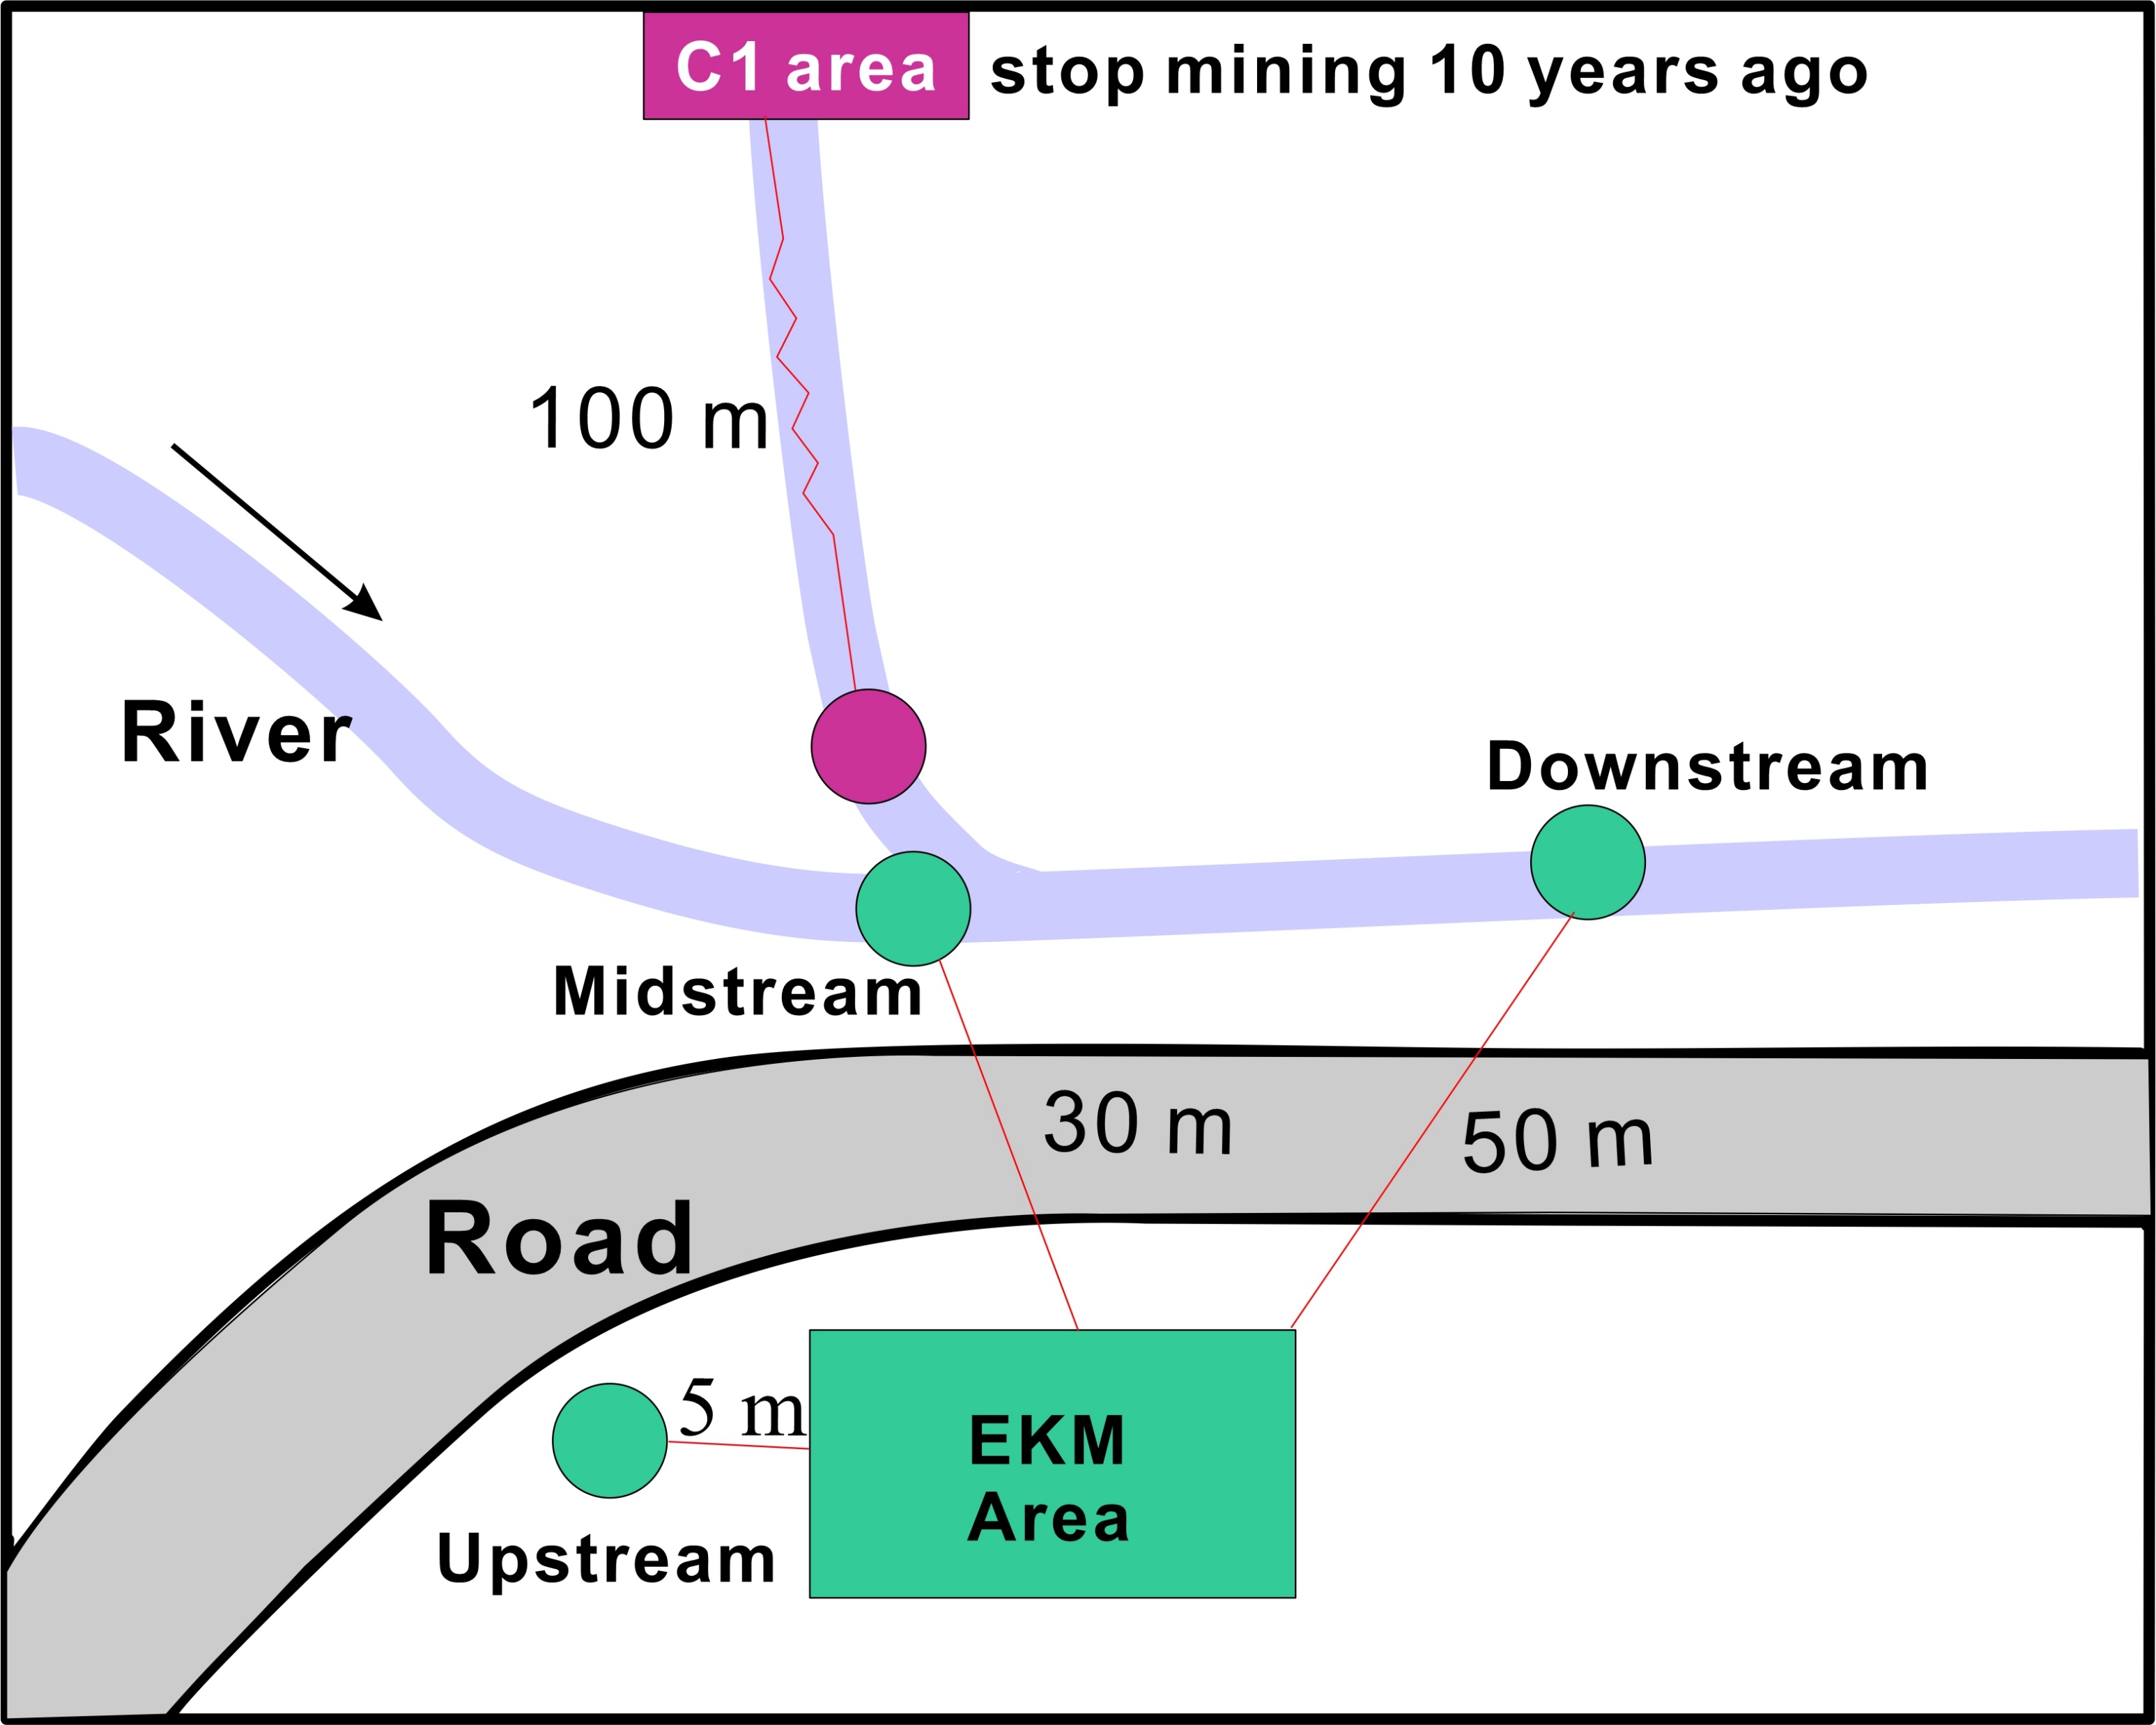
**

**Fig. S15.** Illustration of the EKM area and three (in the upstream, midstream, and downstream, respectively) environmental monitoring points.

**Fig. S16.** The variations of NH4+ concentrations in the groundwater during the industrial-scale EKM experiment.


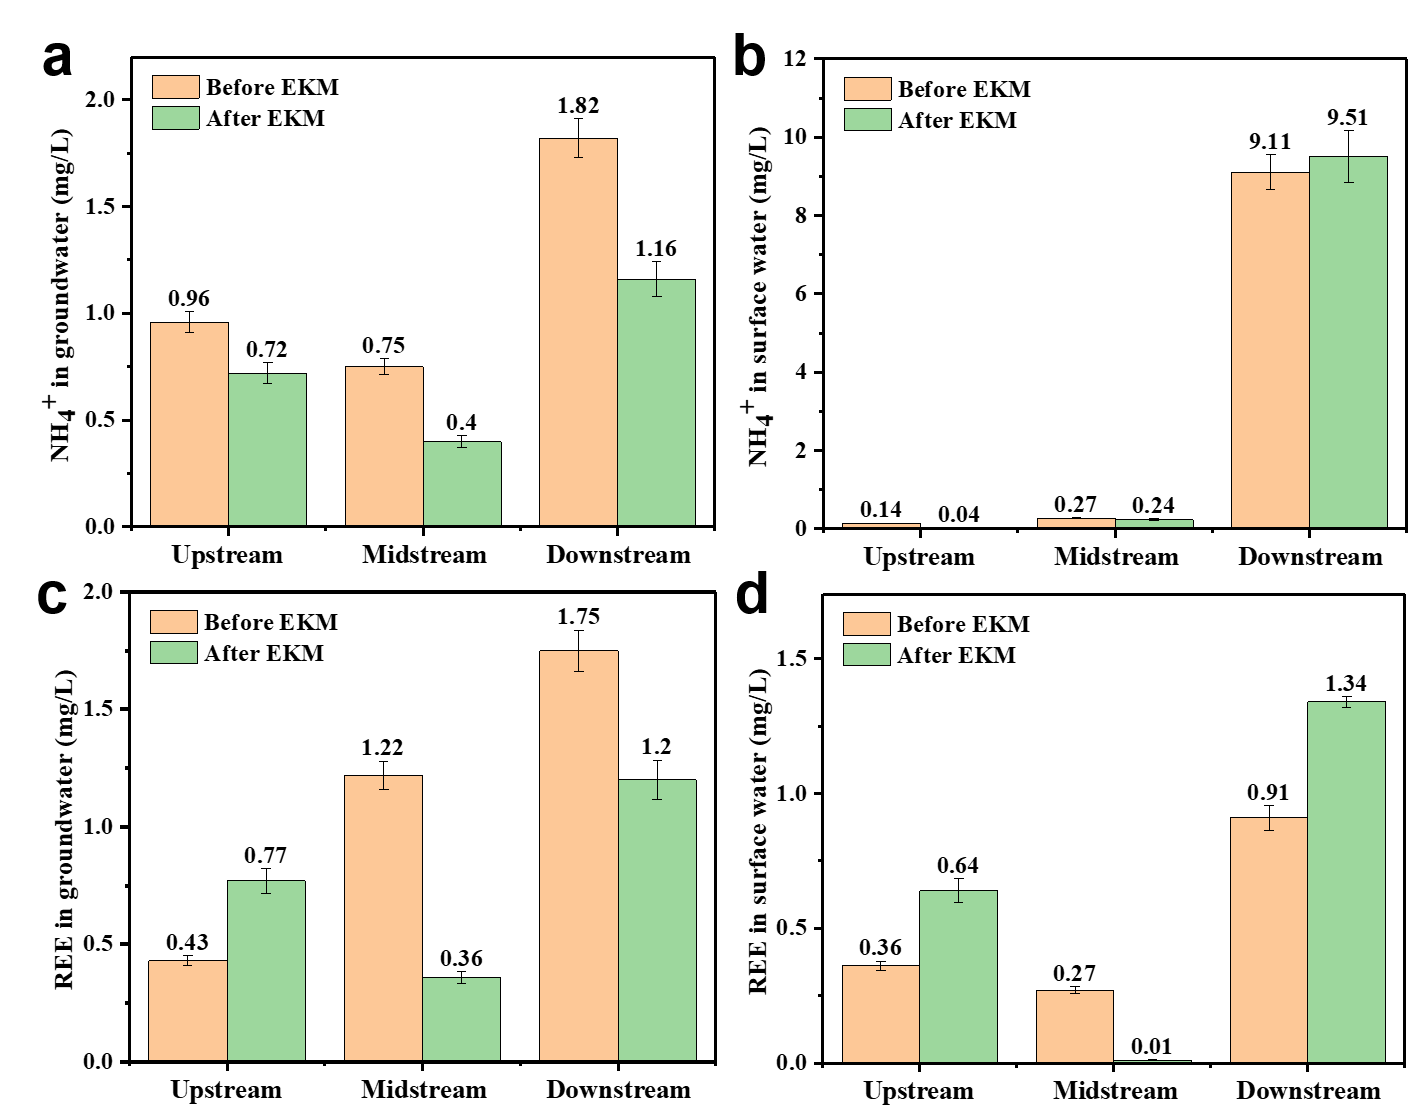


**Fig. S17.** (a-b) The variation of NH4+ concentration in the groundwater and surface water in three monitoring points before and after EKM. (d-e) The variation of REE concentration in the groundwater and surface water in three monitoring points before and after EKM.

**Fig. S18.** The variations of NH4+ concentrations in the collected leachate using conventional and EKM techniques, respectively.

**Table S1.** The ion-exchangeable REE concentrations in the mining ore (samples were collected from 9 exploratory holes). Unit: mg/kg.

| **Depth/m** | **D1** | **D2** | **D3** | **D4** | **D5** | **D6** | **D7** | **D8** | **D9** |
| --- | --- | --- | --- | --- | --- | --- | --- | --- | --- |
| **0.5** | 102 | 89 | 70 | 127 | 64 | 92 | 134 | 211 | 172 |
| **1.0** | 139 | 49 | 76 | 97 | 70 | 64 | 157 | 73 | 100 |
| **1.5** | 17 | 81 | 105 | 84 | 71 | 67 | 144 | 135 | 122 |
| **2.0** | 55 | 123 | 100 | 80 | 70 | 47 | 127 | 249 | 129 |
| **2.5** | 77 | 43 | 57 | 52 | 51 | 83 | 116 | 89 | 120 |
| **3** | 71 | 64 | 45 | 90 | 43 | 81 | 98 | 118 | 85 |
| **4** | 22 | 34 | 30 | 58 | 45 | 32 | 232 | 101 | 92 |
| **5** | 16 | 51 | 43 | 28 | 35 | 42 | 125 | 148 | 79 |
| **6** | 41 | 55 | 41 | 43 | 70 | 46 | 157 | 140 | 88 |
| **7** | 105 | 41 | 52 | 93 | 50 | 119 | 287 | 174 | 88 |
| **8** | 100 | 62 | 78 | 254 | 64 | 27 | 517 | 234 | 85 |
| **9** | 132 | 91 | 89 | 455 | 99 | 20 | 635 | 222 | 90 |
| **10** | 166 | 125 | 69 | 144 | 120 | 27 | 556 | 277 | 63 |
| **11** | 188 | 351 | 187 | 784 | 142 | 36 | 731 | 382 | 84 |
| **12** | 269 | 468 | 251 | 820 | 167 | 35 | 1146 | 442 | 78 |
| **13** | 243 | 604 | 379 | 972 | 246 | 255 | 695 | 554 | 64 |
| **14** | 291 | 676 | 489 | 678 | 329 | 323 |  | 649 | 96 |
| **15** | 326 | 970 | 549 | 1155 | 385 | 332 |  | 641 | 210 |
| **16** | 463 | 1136 | 708 | 874 | 380 | 281 |  | 851 | 220 |
| **17** | 680 | 886 | 592 |  | 659 | 624 |  | 1211 | 651 |
| **18** | 805 | 1237 | 858 |  | 604 | 462 |  | 1504 | 666 |
| **19** | 662 | 1011 |  |  | 659 | 652 |  | 1196 | 1184 |
| **20** | 833 |  |  |  |  | 477 |  | 1243 | 700 |
| **21** | 993 |  |  |  |  | 611 |  |  | 1174 |
| **22** | 953 |  |  |  |  | 826 |  |  | 1011 |
| **23** | 960 |  |  |  |  | 614 |  |  |  |
| **24** | 842 |  |  |  |  | 670 |  |  |  |
| **Orebody thickness/m** | 9 | 8 | 5 | 6 | 3 | 8 | 6 | 9 | 6 |
| **Average REE content** | 354 | 375 | 232 | 400 | 201 | 257 | 366 | 472 | 298 |

**Table S2.** REE reserves in the mining ore.

| **REE content** | **Average content**  **mg/kg** | **Soil volume**  **m3** | **Soil weight**  **t** | **REE reserve**  **t** |
| --- | --- | --- | --- | --- |
| **>400 mg/kg** | 708 | 1250 | 1875 | 1.54 |
| **>300 mg/kg** | 660 | 1390 | 2085 | 160 |
| **>200 mg/kg** | 627 | 1530 | 2300 | 1.67 |
| **>100 mg/kg** | 487 | 2040 | 3060 | 1.73 |
| **Total** | 330 | 3400 | 5100 | 1.95 |

*T*: the total REE content; *Adv*: the average REE content; *W*: the soil weight

**Table S3.** The connections of electrodes in each mining period using the intermittent-polling power-on (IPPO) strategy during EKM.

| Mining period | The power-on electrodes | | | |
| --- | --- | --- | --- | --- |
| 1 | R1R2 | R5R6 | R9R10 | R13R14 |
| 2 | R2R3 | R6R7 | R10R11 | R14R15 |
| 3 | R3R4 | R7R8 | R11R12 | R15R16 |

**Table S4.** The added concentration and amount of leaching agentin the industrial-scale EKM

| **Date** | **Added volume (m3)** | **NH4+ concentration (wt.%)** | **Added amount of (NH4+)2SO4 (t)** |
| --- | --- | --- | --- |
| **Day 1** | 120 | 2.5 | 3 |
| **Day 2** | 150 | 1 | 1.5 |
| **Day 3** | 150 | 1 | 1.5 |
| **Day 4** | 150 | 0.167 | 0.25 |
| **Day 5** | 150 | 0.167 | 0.25 |
| **Day 6** | 150 | 0.167 | 0.25 |
| **Day 7** | 150 | 0.167 | 0.25 |
| **Day 8** | 150 | 0.167 | 0.25 |
| **Day 9** | 150 | 0.167 | 0.25 |
| **Day 10** | 150 | 0.167 | 0.25 |
| **Day 11** | 150 | 0.167 | 0.25 |
| **Total** | | | 8 |

**Table S5.** The production cost of this industrial-scale EKM experiment. Unit: $.

| **Inventory** | **Equipment** | **Materials** | **Electricity** | **Labor** | **Engineering** | **Total** |
| --- | --- | --- | --- | --- | --- | --- |
| **Cost** | 43,527 | 16,641 | 2,102 | 5,598 | 12,736 | 80,604 |

**Table S6.** The production costs for obtaining 1 t of REO by the conventional and the EKM techniques. Unit: $.

| **Categories** | | **The conventional** | **The EKM** |
| --- | --- | --- | --- |
| **Equipment** | Power supply | n/a | 420 |
| Other equipment | 28 | 28 |
| **Materials** | Electric wires | 14 | 70 |
| CPE | n/a | 812 |
| Injection tube | 182 | 420 |
| Agents | 2,477 | 1,386 |
| **Electricity** | Electricity by power supply | n/a | 420 |
| Electricity by other equipment | 350 | 350 |
| **Labor** | Labor | 798 | 798 |
| **Engineering** | Engineering | 2,365 | 2,365 |
| **Total cost** |  | 6,214 | 7,078 |

ND: the environmental cost was not considered in this industrial-scale EKM experiment.

**References**

1. Jiang Y*, et al.* Novel insight into the inhibitory effects and mechanisms of Fe(II)-mediated multi-metabolism in anaerobic ammonium oxidation (anammox). *Water Research.* **242**, 120291 (2023).

2. Tan W*, et al.* Feasibility of visible short-wave infraed reflectance spectroscopy to characterize regolith-hosted rare earth element mineralization. *Econ. Geol.* **117**, 495-508 (2021).

3. Tan W*, et al.* Visible/near infrared reflectance (VNIR) spectral features of ion-exchangeable Rare earth elements hosted by clay minerals: Potential use for exploration of regolith-hosted REE deposits. *Appl. Clay Sci.* **215**, 106320 (2021).

4. Yang XJ, *et al.* China's ion-adsorption rare earth resources, mining consequences and preservation. *Environ. Dev.* **8**, 131-136 (2013).

5. Lee JCK, Wen Z. Rare earths from mines to metals: Comparing environmental impacts from China's main production pathways. *J. Ind. Ecol.* **21**, 1277-1290 (2017).
